# Supplementary material for: N-Methyl-D-Aspartate Receptors Involvement in the Gentamicin-Induced Hearing Loss and Pathological Changes of Ribbon Synapse in the Mouse Cochlear Inner Hair Cells
Source: Neural Plast. 2018 Jul 15;2018:3989201. doi: 10.1155/2018/3989201 (PMC6079453; doi:10.1155/2018/3989201)
Supplement: Supplementary Materials — Supplementary Table 1: the number of presynaptic ribbons, postsynaptic AMPARs, and ribbon synaptic pairs in different groups. Supplementary Table 2: the number of the AMPARs and NMDARs at the IHC-SGN synapse in different groups. Legends of supplemental videos: Supplemental Video 1: spatial distribution of NMDARs and AMPARs in the IHC-SGN synapse of normal mouse mature cochlea. Supplemental Video 2: spatial distribution of NMDARs and AMPARs in the IHC-SGN synapse of gentamicin treated mouse cochlea (GM 7d). Supplemental Video 3: spatial distribution of ribbons and AMPARs in the IHC-SGN synapse of normal mouse mature cochlea. Supplemental Video 4: spatial distribution of ribbons and AMPARs in the IHC-SGN synapse of gentamicin-treated mouse cochlea (GM 4d). Supplemental Video 5: spatial distribution of ribbons and AMPARs in the IHC-SGN synapse of gentamicin and MK801-treated mouse cochlea (GM + MK 4d). [file 3989201.f1.zip]

Archive with 6 entries (6 files):
- Video 5.MP4
- Video 4.MP4
- Video 3.MP4
- Video 2.MP4
- Video 1.MP4
- supplemental materiels.pdf
